# Supplementary material for: GC-FTICR mass spectrometry with dopant assisted atmospheric pressure photoionization: application to the characterization of plastic pyrolysis oil
Source: Royal Society of Chemistry journal article supplement (doi:10.1039/d3an01246h), 2023-01-01
Supplement: d3an01246h1.pdf [file d3an01246h1.pdf]

## GC-FTICR mass spectrometry with dopant assisted atmospheric pressure photoionization: application to the characterization of plastic pyrolysis oil

Charlotte Mase<sup>a, b, c</sup>, Julien F. Maillard<sup>b, c</sup>, Marco Piparo<sup>b, c</sup>, Lukas Friederici<sup>d</sup>, Christopher P. Ruger<sup>c, d</sup>,  
Sabrina Marceau<sup>b, c</sup>, Benoit Paupy<sup>b, c</sup>, Marie Hubert-Roux<sup>a, c</sup>, Carlos Afonso\*<sup>a, c</sup> and Pierre Giusti<sup>a, b, c</sup>

<sup>a</sup> Univ Rouen Normandie, INSA Rouen Normandie, CNRS, Normandie Univ, COBRA UMR 6014, INC3M  
FR 3038, F-76000 Rouen, France

<sup>b</sup> TotalEnergies OneTech, Total Research and Technology Gonfreville TRTG, BP 27, 76700 Harfleur,  
France

<sup>c</sup> International Joint Laboratory – iC2MC: Complex Matrices Molecular Characterization, TRTG, BP 27,  
76700 Harfleur, France

<sup>d</sup> Joint Mass Spectrometry Centre / Chair of Analytical Chemistry, University of Rostock, Albert-  
Einstein-Strae 27, 18059 Rostock, Germany

### Supporting information

| Table S1. List of compounds used for internal calibration |            |        |
|-----------------------------------------------------------|------------|--------|
| Molecular ion formula                                     | Exact mass | Charge |
| C12H22                                                    | 166.171602 | 1+     |
| C13H24                                                    | 180.187252 | 1+     |
| C14H26                                                    | 194.202902 | 1+     |
| C15H28                                                    | 208.218552 | 1+     |
| C16H28                                                    | 220.218552 | 1+     |
| C16H30                                                    | 222.234202 | 1+     |
| C17H26                                                    | 230.202902 | 1+     |
| C17H32                                                    | 236.249852 | 1+     |
| C18H32                                                    | 248.249852 | 1+     |
| C18H34                                                    | 250.265503 | 1+     |
| C19H30                                                    | 258.234202 | 1+     |
| C19H36                                                    | 264.281153 | 1+     |
| C20H32                                                    | 272.249852 | 1+     |
| C20H38                                                    | 278.296803 | 1+     |
| C21H38                                                    | 290.296803 | 1+     |
| C21H40                                                    | 292.312453 | 1+     |
| C22H38                                                    | 302.296803 | 1+     |
| C22H42                                                    | 306.328103 | 1+     |
| C23H44                                                    | 320.343753 | 1+     |
| C24H44                                                    | 332.343753 | 1+     |

|        |            |    |
|--------|------------|----|
| C24H46 | 334.359403 | 1+ |
| C25H42 | 342.328103 | 1+ |
| C25H48 | 348.375053 | 1+ |
| C26H50 | 362.390703 | 1+ |
| C27H50 | 374.390703 | 1+ |
| C27H52 | 376.406353 | 1+ |
| C28H54 | 390.422003 | 1+ |
| C29H50 | 398.390703 | 1+ |
| C29H56 | 404.437653 | 1+ |
| C30H56 | 416.437653 | 1+ |
| C30H58 | 418.453303 | 1+ |
| C31H60 | 432.468953 | 1+ |
| C32H56 | 440.437653 | 1+ |
| C32H62 | 446.484603 | 1+ |
| C33H58 | 454.453303 | 1+ |
| C33H62 | 458.484603 | 1+ |
| C33H64 | 460.500253 | 1+ |
| C34H60 | 468.468953 | 1+ |
| C34H66 | 474.515904 | 1+ |
| C35H68 | 488.531554 | 1+ |
| C36H68 | 500.531554 | 1+ |
| C36H70 | 502.547204 | 1+ |
| C37H66 | 510.515904 | 1+ |
| C37H72 | 516.562854 | 1+ |
| C38H74 | 530.578504 | 1+ |
| C39H70 | 538.547204 | 1+ |
| C39H74 | 542.578504 | 1+ |
| C39H76 | 544.594154 | 1+ |
| C40H78 | 558.609804 | 1+ |
| C41H78 | 570.609804 | 1+ |
| C41H80 | 572.625454 | 1+ |
| C42H82 | 586.641104 | 1+ |
| C43H84 | 600.656754 | 1+ |

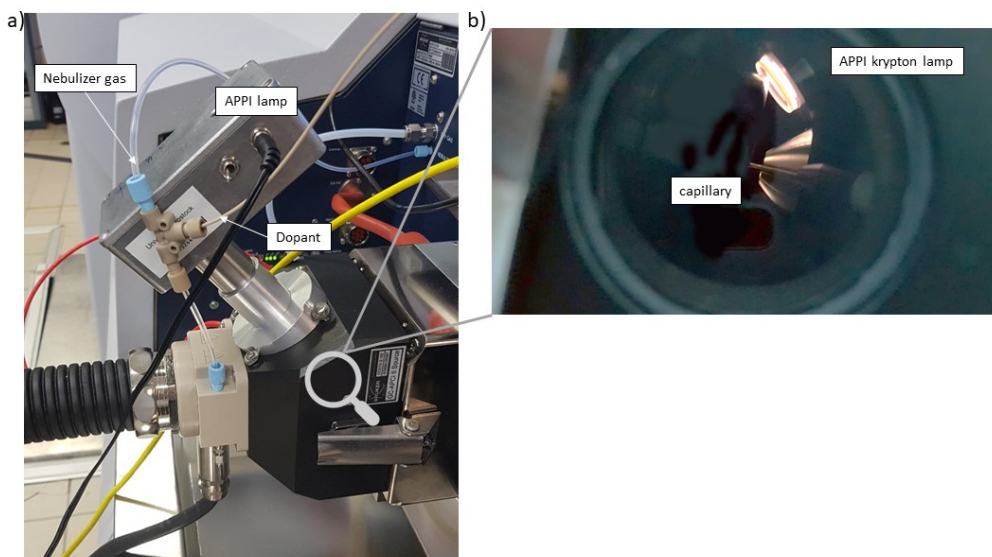

Figure S1. GC-APPI-FTICR MS interface with (a) T piece for dopant addition and inset of source inside. (b) Zoom of the APPI krypton lamp with the GC capillary.

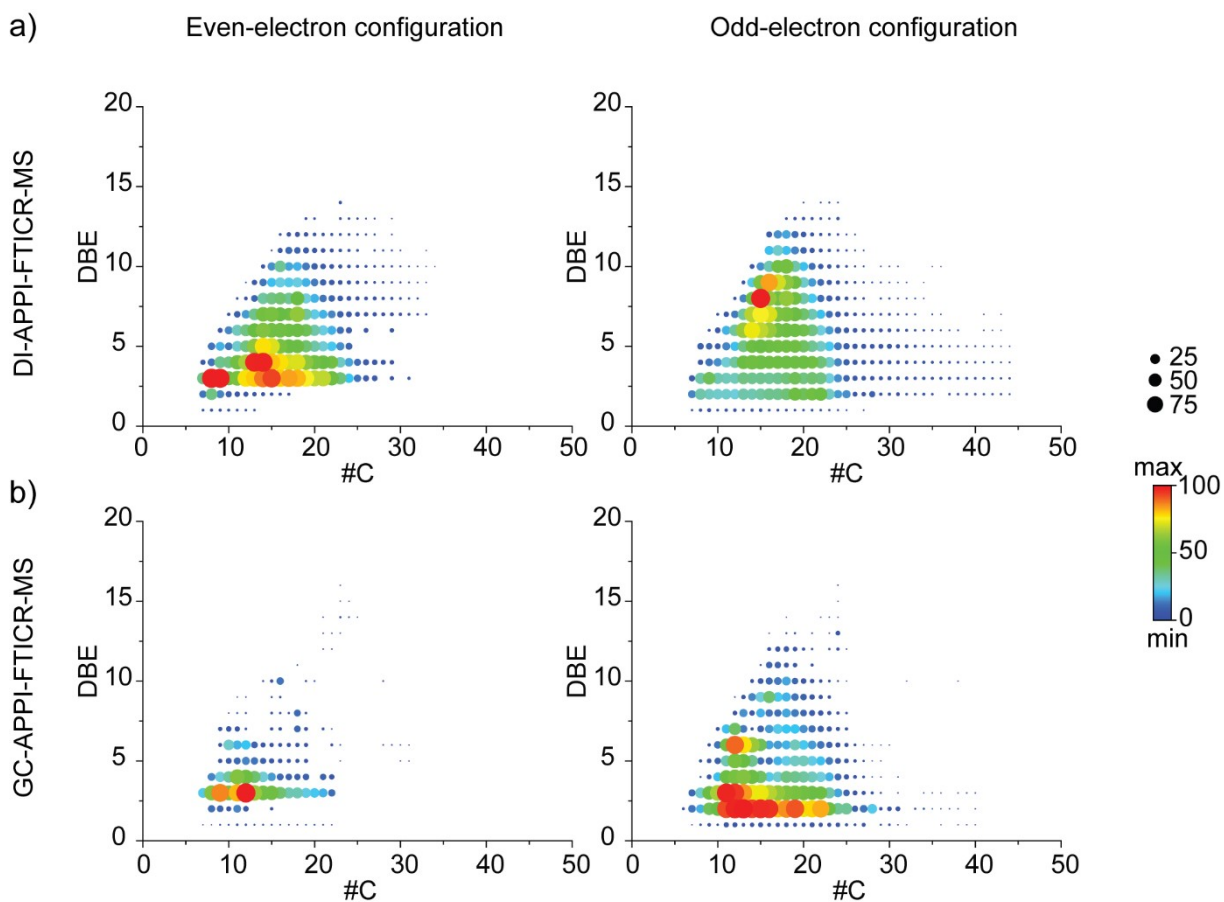

Figure S2. DBE versus carbon number plots of hydrocarbon class for (a) DI-APPI-FTICR MS and (b) GC-APPI-FTICR MS experiments for odd- and even-electron configuration

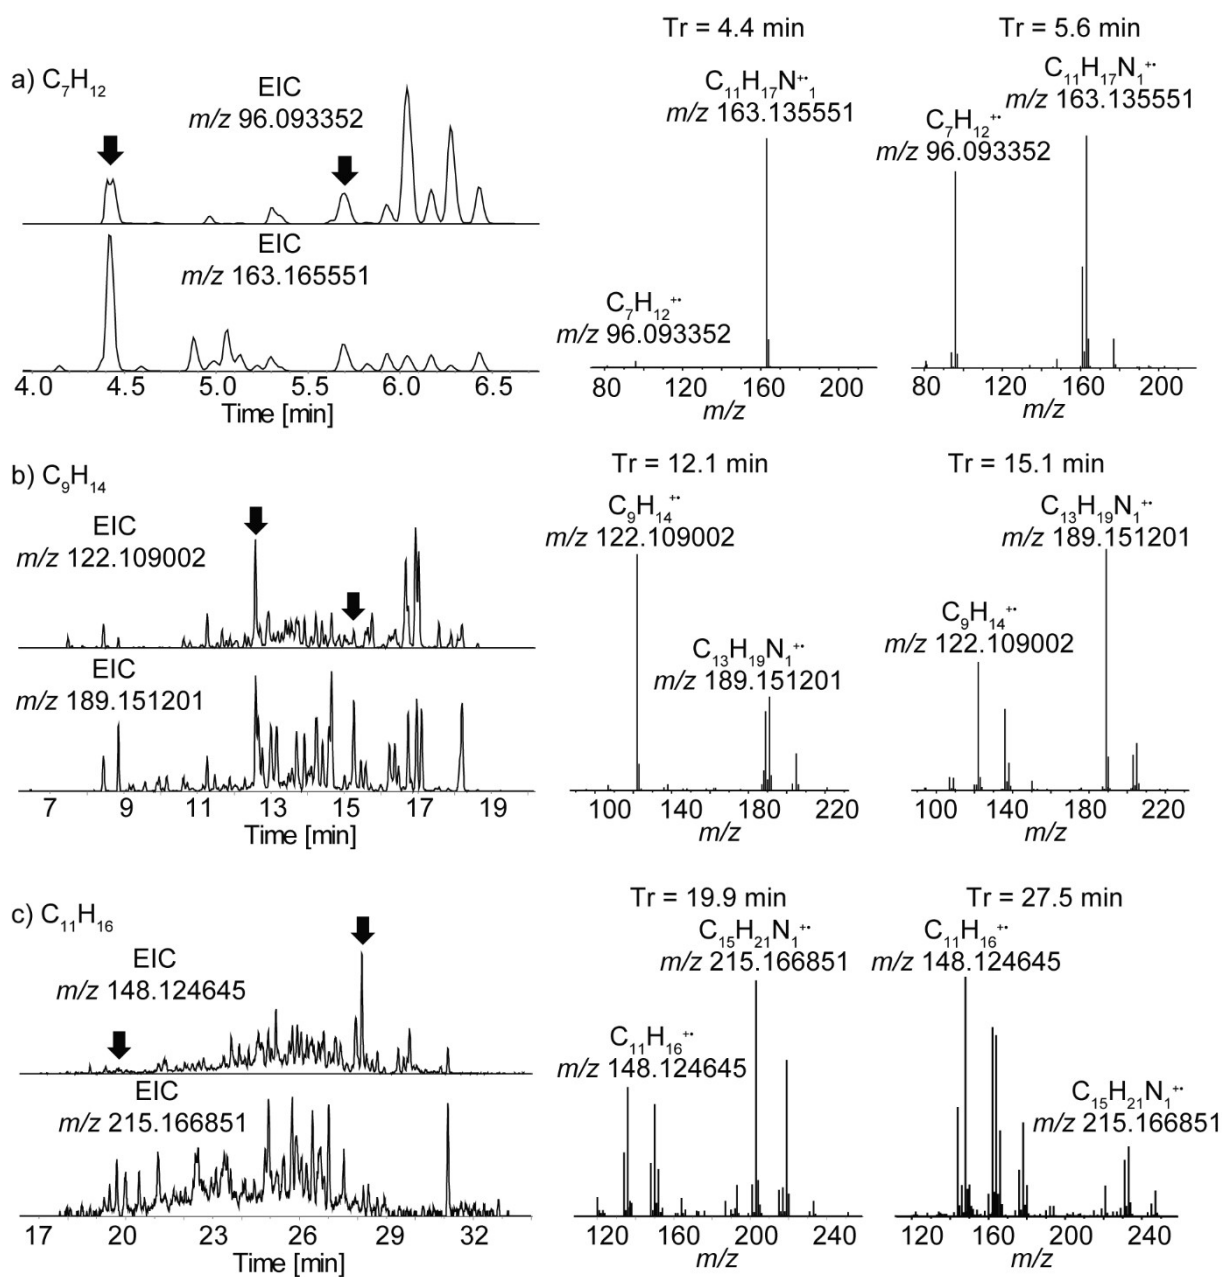

Figure S3. Extracted ion chromatograms of GC-APPI-FTICR MS experiment with pyrrole as dopant of three molecules (a)  $C_7H_{12}$ , (b)  $C_9H_{14}$ , and (c)  $C_{11}H_{16}$  ionized in the form  $M^{+}$  or  $[M+\text{pyrrole}]^+$ . The corresponding mass spectra of the mentioned retention times were given. Note that chromatograms were extracted with 0.001 tolerance of the mass.

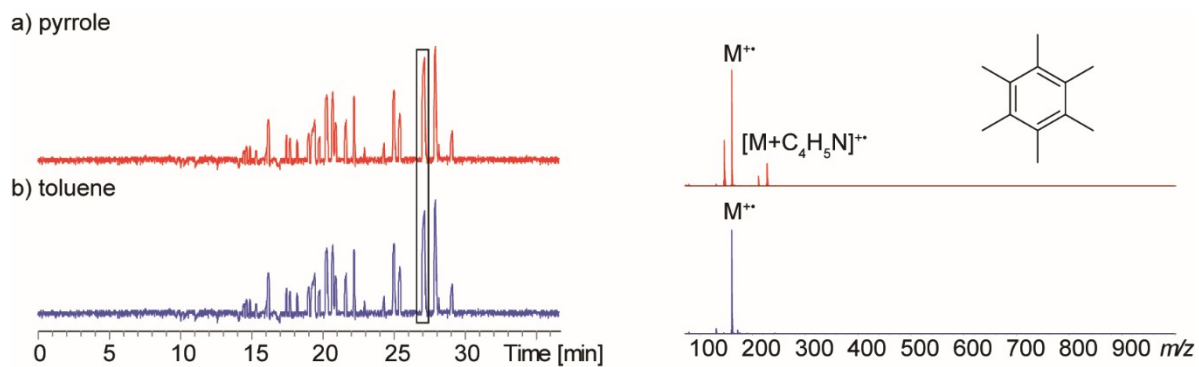

Figure S4. Total ion chromatogram and corresponding mass spectra of the peak at 27 min using (a) pyrrole and (b) toluene as dopants for the analysis of aromatic standard solutions.

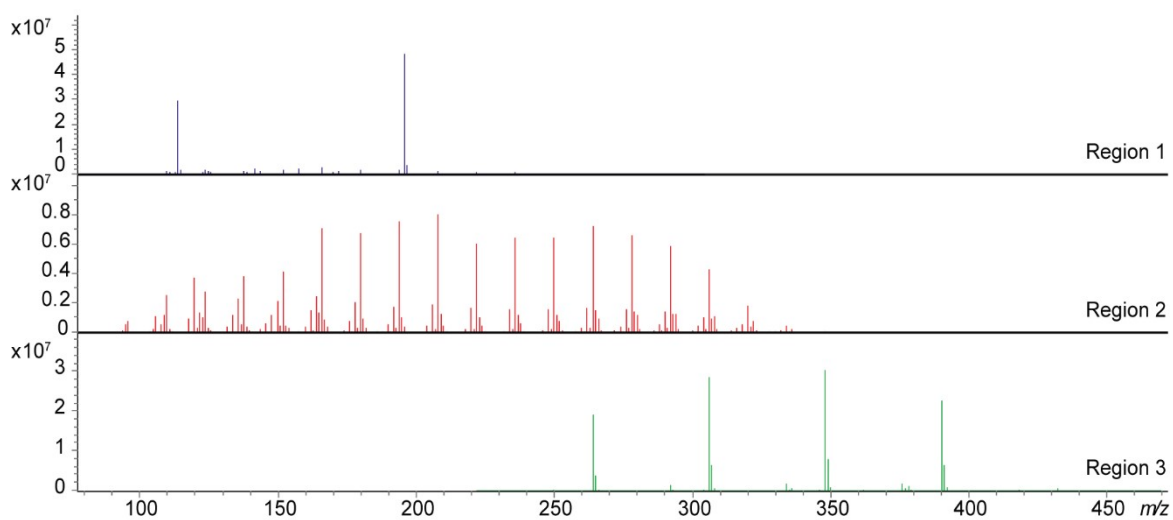

Figure S5. Mass spectra obtained for the three areas for the analysis of plastic pyrolysis oil using toluene as dopant. Region 1 corresponds to the nitrogen-containing species, region 2 to the CH compounds, and region 3 to the fragments.

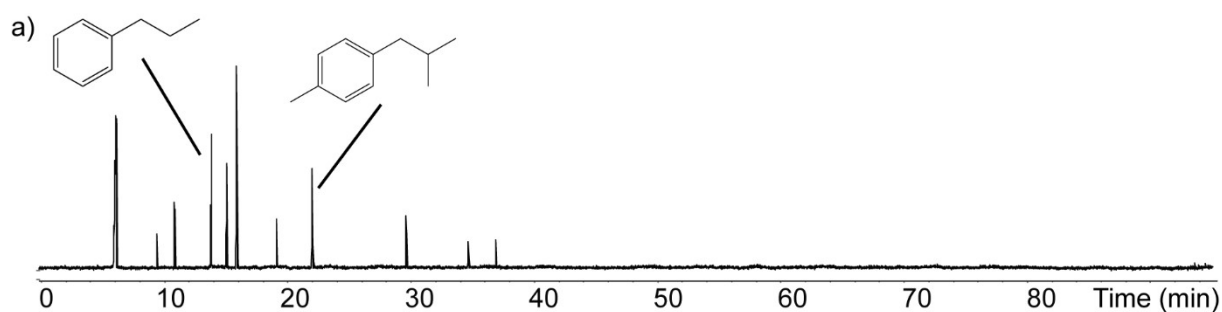

b) 14.1 min

No dopant

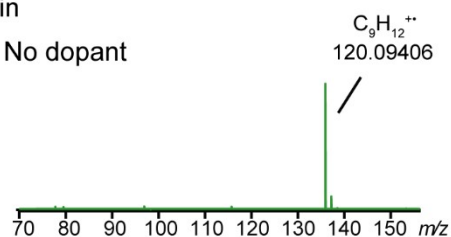

Pyrrole

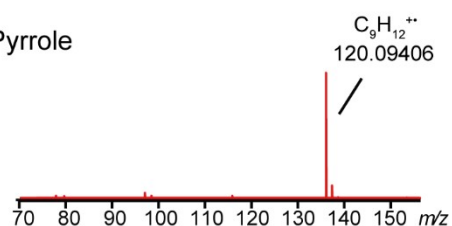

Toluene

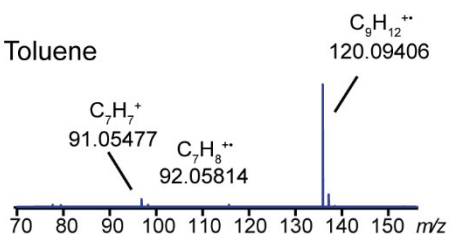

Benzene

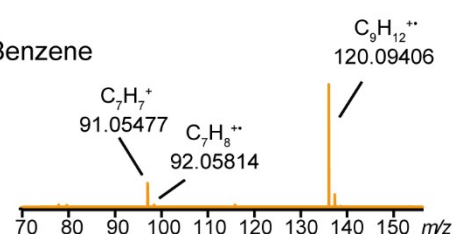

c) 24.3 min

No dopant

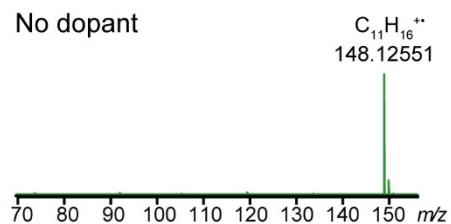

Pyrrole

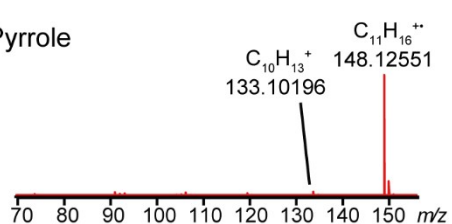

Toluene

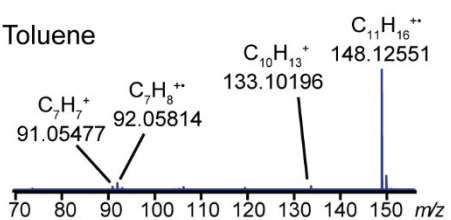

Benzene

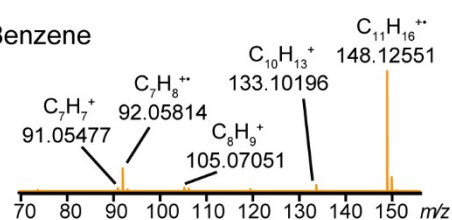

Figure S6. (a) Chromatogram of standards with mass spectra for (b) the peak at 14.1 min corresponding to  $C_9H_{12}$  compound ionized at  $m/z$  120.09406 and (c) the peak at 24.3 min corresponding to  $C_{11}H_{16}$  compound ionized at  $m/z$  148.12551 obtained with the four conditions (without dopant, with pyrrole, with toluene, and with benzene).

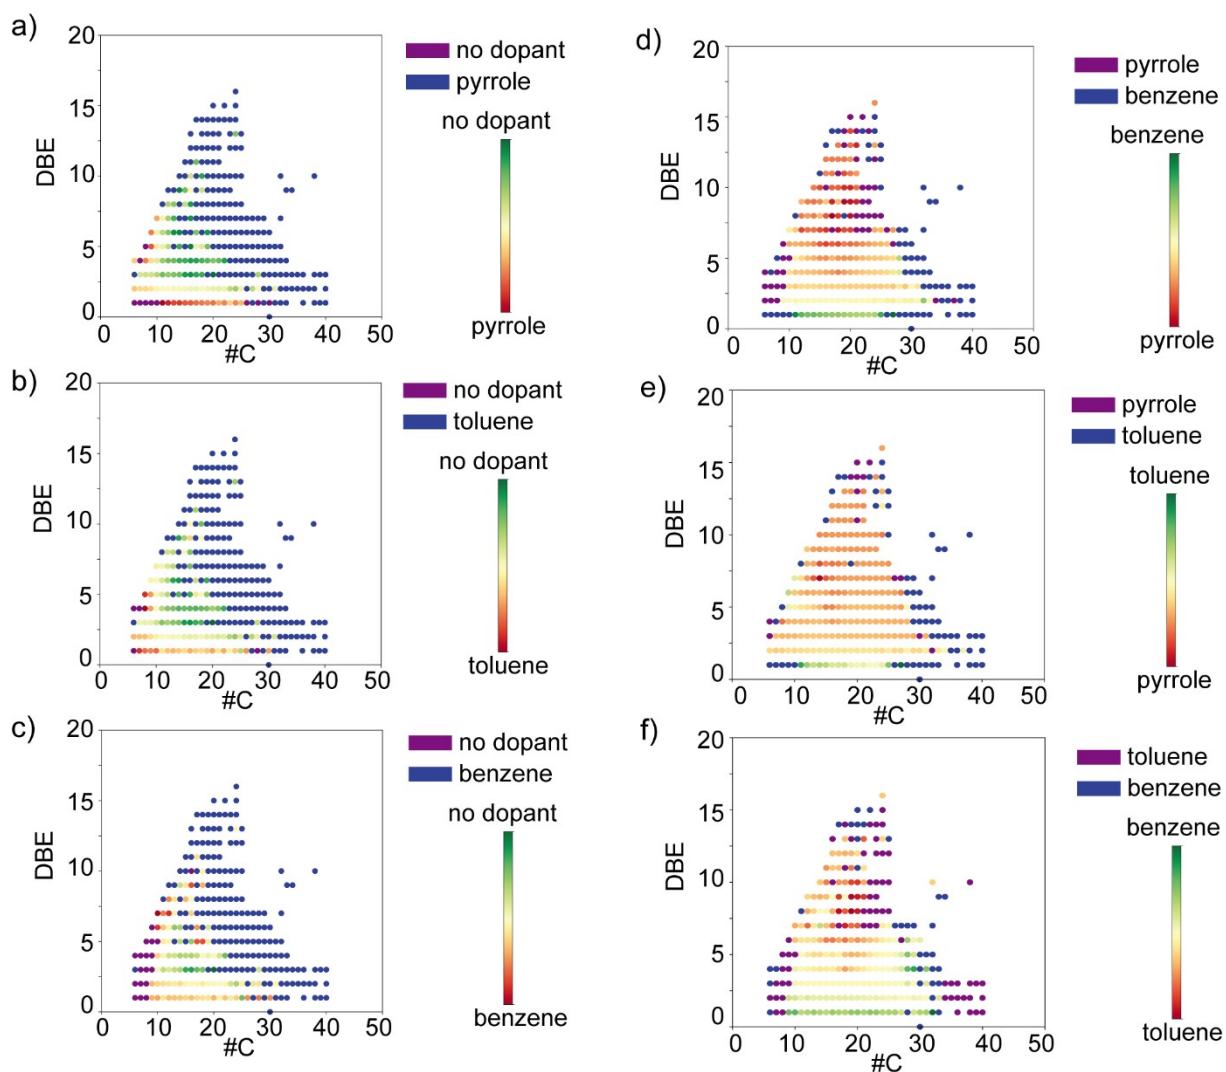

Figure S7. DBE versus carbon number plots using fold change of CH class as color map for (a) no dopant vs pyrrole experiment, (b) no dopant vs toluene experiment, (c) no dopant vs benzene experiment, (d) pyrrole vs benzene experiment, (e) pyrrole vs toluene experiment, and (f) toluene vs benzene experiment. The green to red gradient correspond to all common species between the two experiments. Purple and blue are color corresponding to unique species found.

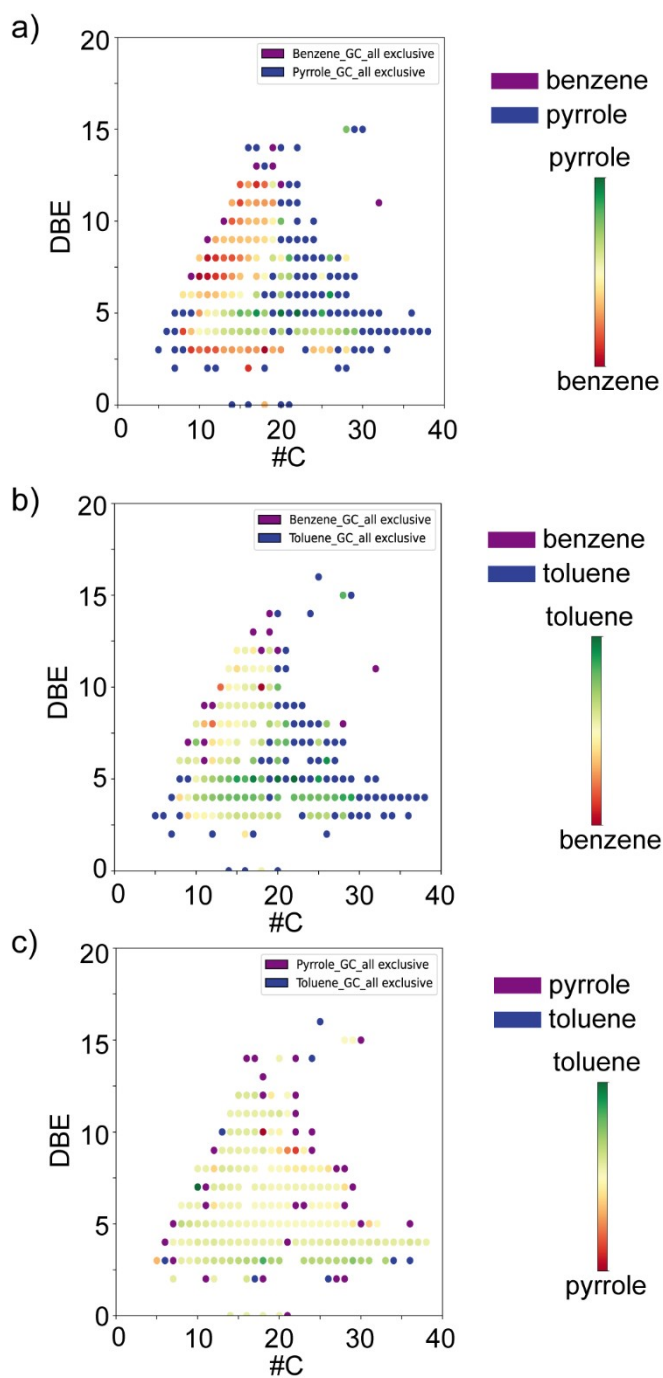

Figure S8. DBE versus carbon number plots of  $N_1$  class using fold change as color map for (a) benzene vs pyrrole experiment, (b) benzene vs toluene experiment, and (c) pyrrole vs toluene experiment.



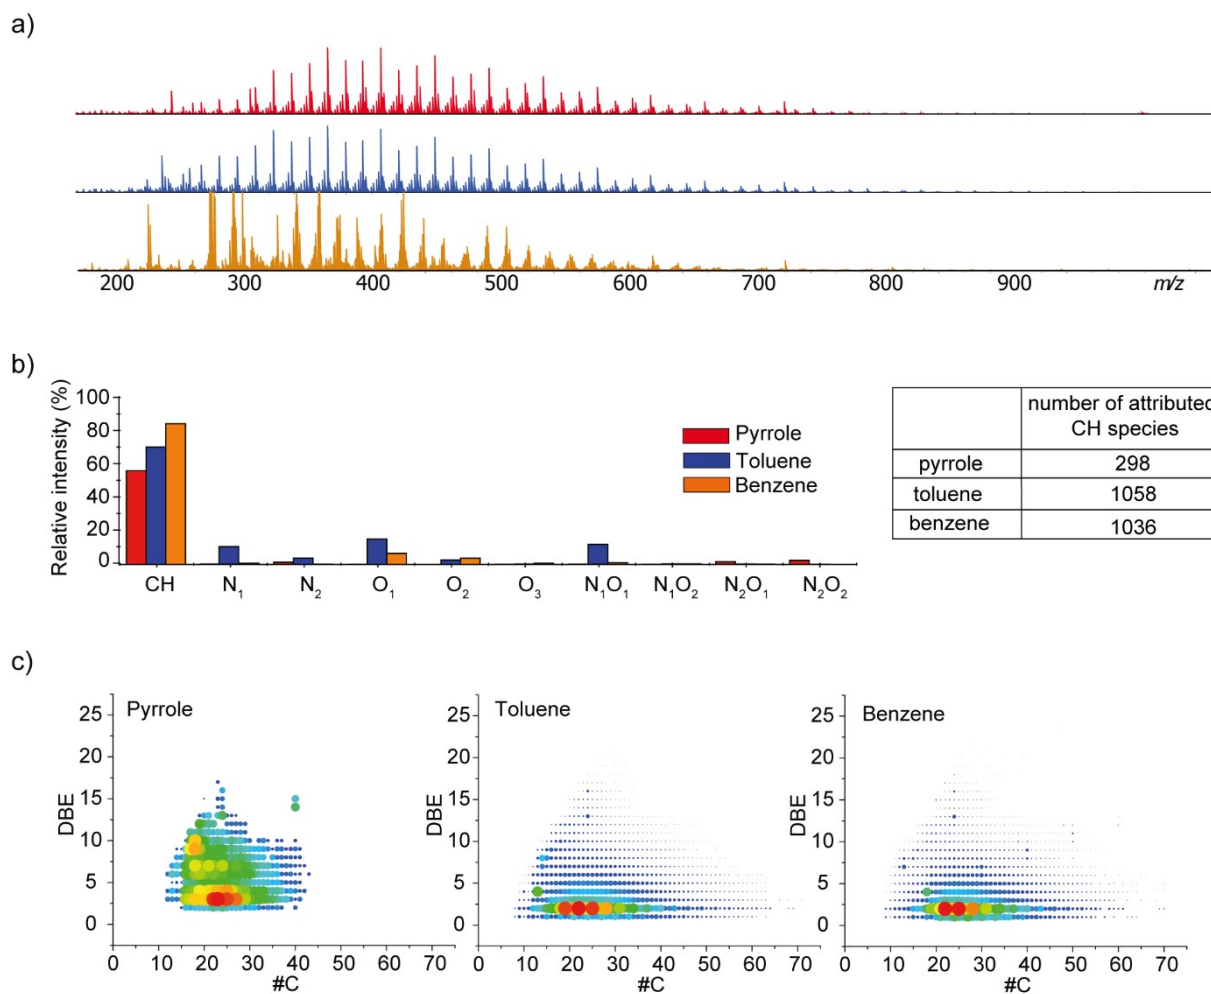

Figure S9. (a) average mass spectra of plastic pyrolysis oil obtained by DI-APPI-FTICR MS with pyrrole (in red), toluene (in blue), and benzene (in yellow). (c) Compound class distribution by the average mass spectrum over 0 to 80 min with the number of ionized CH species. (c) DBE versus carbon number plots for CH class.

No dopant

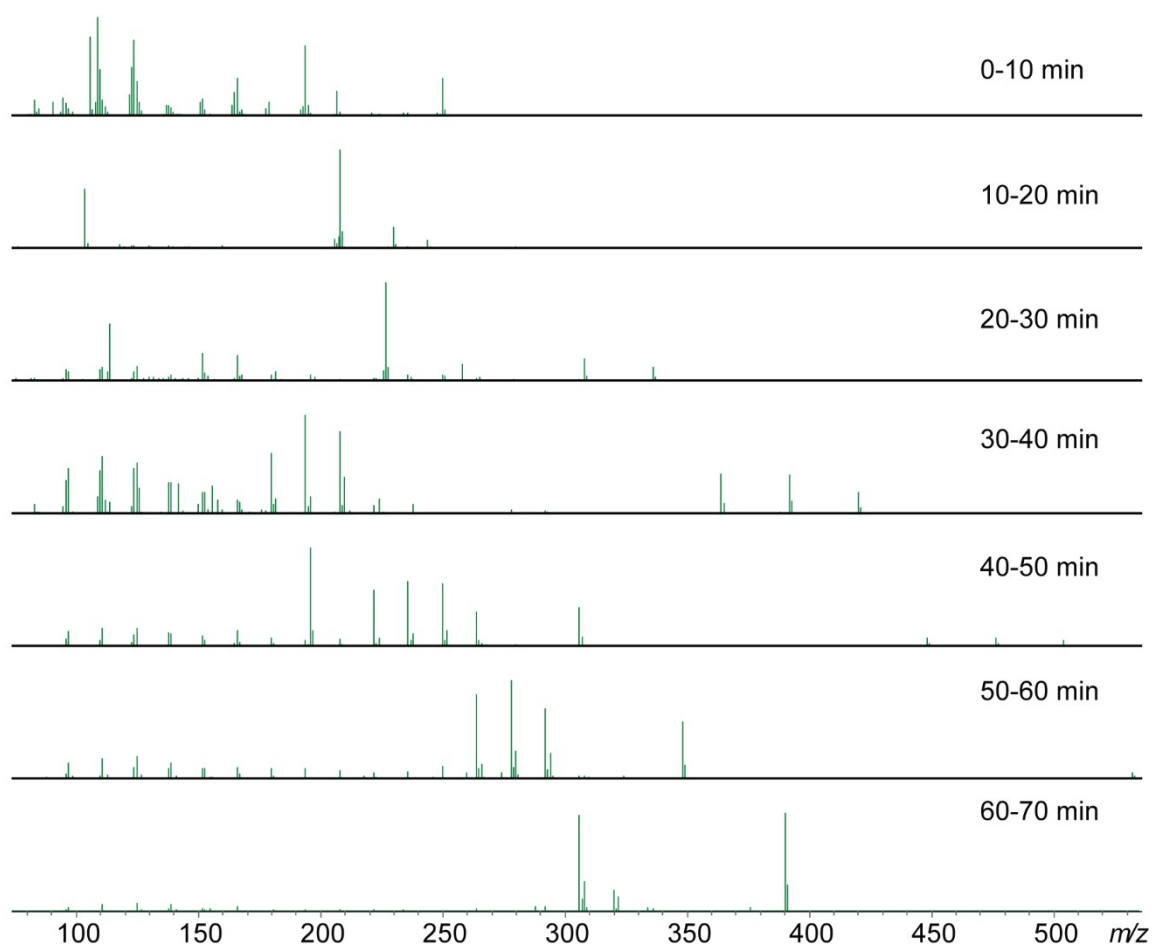

Figure S10. Mass spectra exported for each segment for no dopant experiment on the CH area

Pyrrole

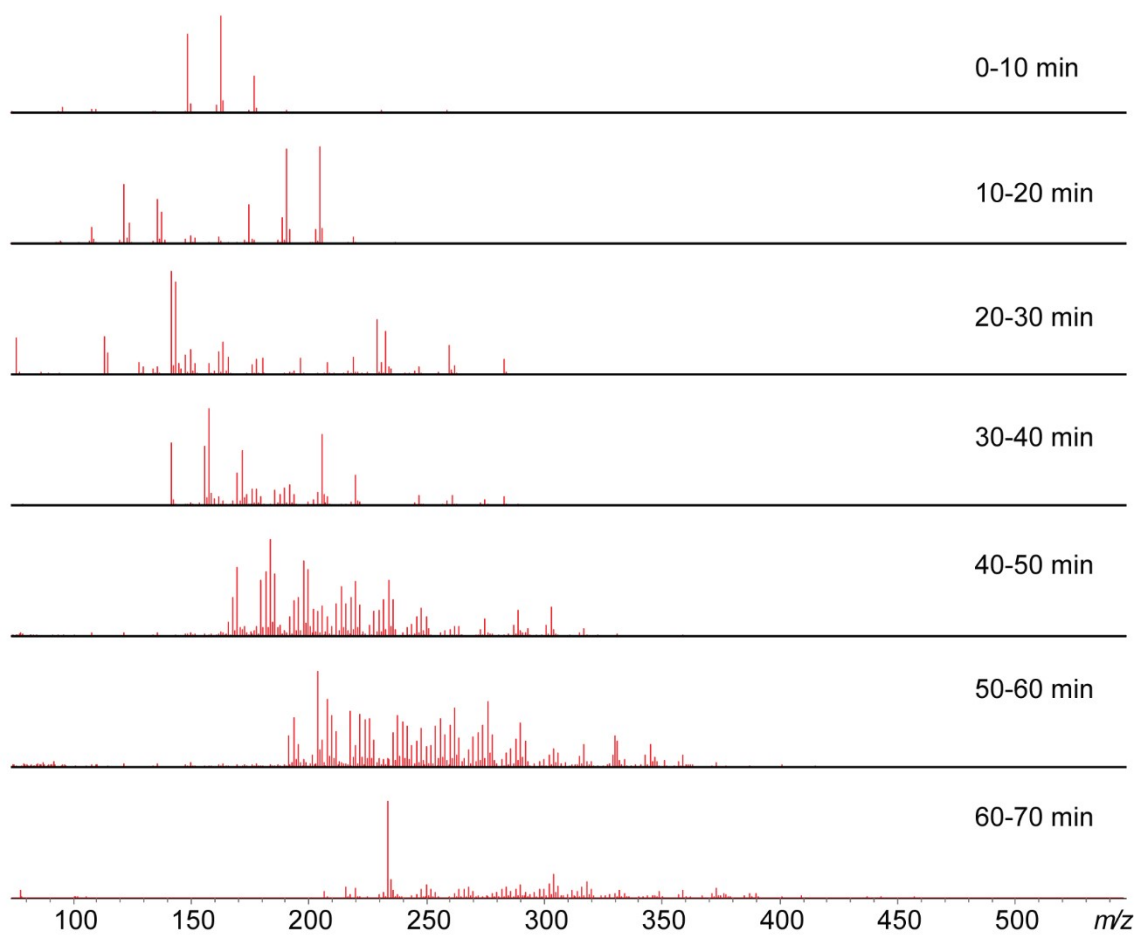

Figure S11. Mass spectra exported for each segment for pyrrole as dopant experiment on the CH area

Toluene

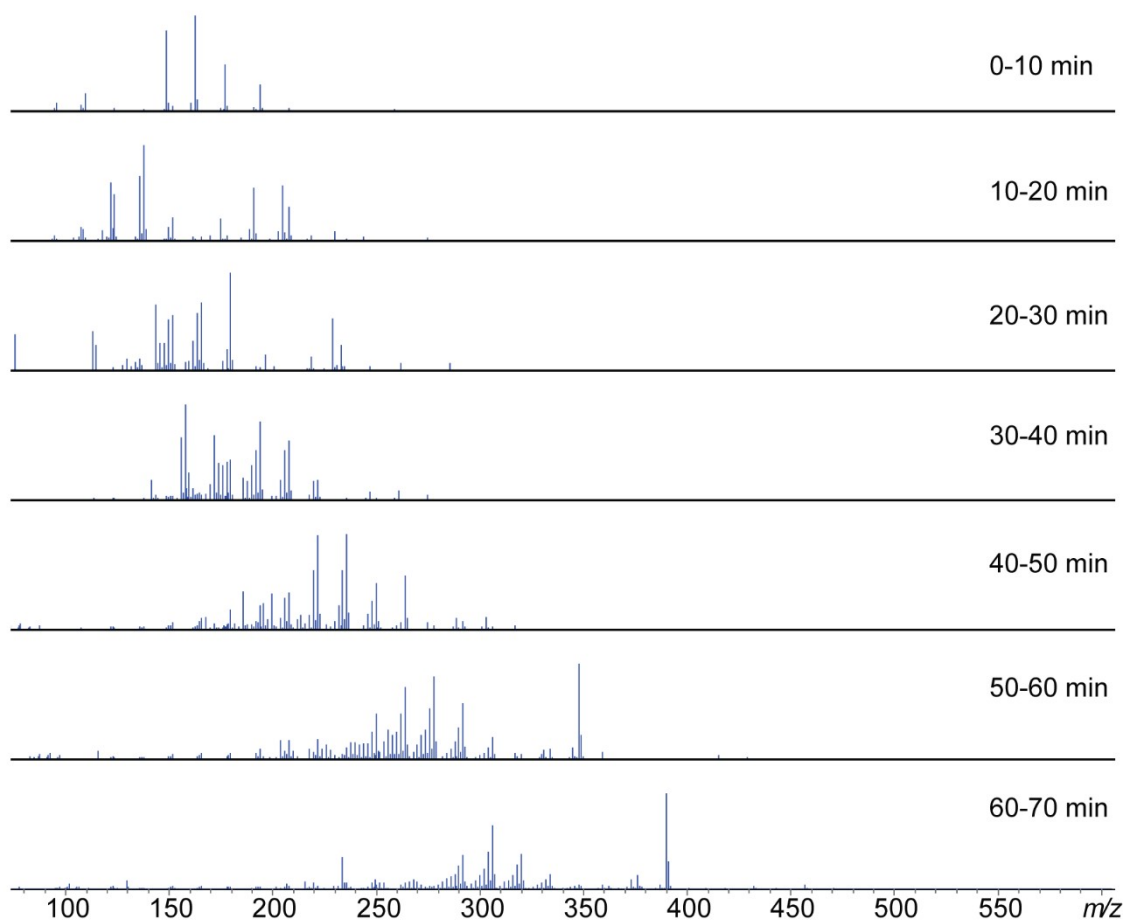

Figure S12. Mass spectra exported for each segment for toluene as dopant experiment on the CH area

Benzene

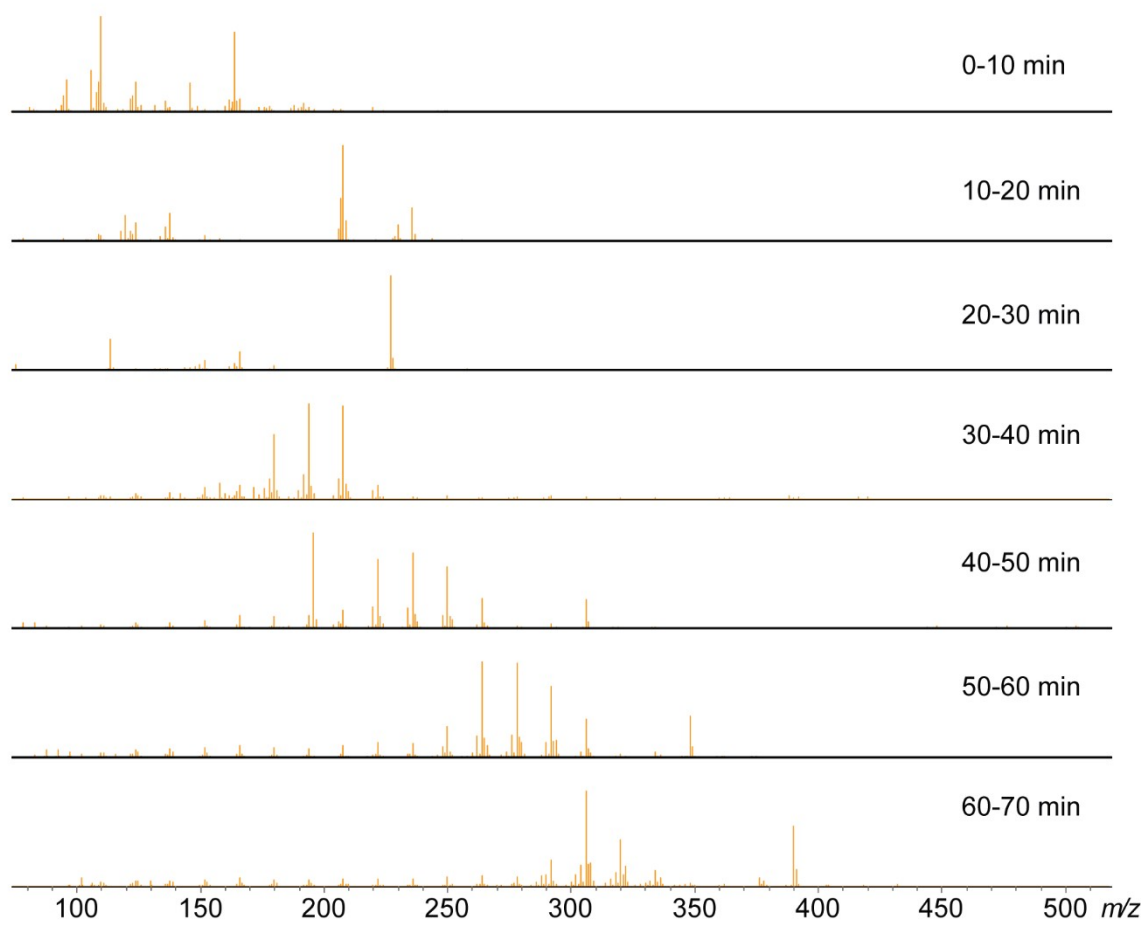

Figure S13. Mass spectra exported for each segment for benzene as dopant experiment on the CH area

Table S2. *m/z* values and corresponding molecular formulas of 25 species presenting DBE 2 value

| <i>m/z</i> | molecular formula |
|------------|-------------------|
| 124.124652 | C9 H16            |
| 138.140302 | C10 H18           |
| 152.155952 | C11 H20           |
| 166.171602 | C12 H22           |
| 180.187252 | C13 H24           |
| 194.202902 | C14 H26           |
| 208.218552 | C15 H28           |
| 222.234202 | C16 H30           |
| 236.249852 | C17 H32           |
| 250.265503 | C18 H34           |
| 264.281153 | C19 H36           |
| 278.296803 | C20 H38           |
| 292.312453 | C21 H40           |
| 306.328103 | C22 H42           |
| 320.343753 | C23 H44           |
| 334.359403 | C24 H46           |
| 348.375053 | C25 H48           |
| 362.390703 | C26 H50           |
| 376.406353 | C27 H52           |
| 390.422003 | C28 H54           |
| 404.437653 | C29 H56           |
| 418.453303 | C30 H58           |
| 432.468953 | C31 H60           |
| 446.484603 | C32 H62           |
| 460.500253 | C33 H64           |
